# Supplementary material for: Bedrock topography and ice thickness distribution of three major Patagonian outlet glaciers unveiled by helicopter-borne ground penetrating radar
Source: Copernicus journal article supplement (doi:10.5194/essd-2025-678), 2026-01-04
Supplement: Supplementary file 1 [file essd-2025-678-supplement.pdf]

## Supplements

for the manuscript

### Bedrock topography and ice thickness distribution of three major Patagonian outlet glaciers unveiled by helicopter-borne ground penetrating radar

Moritz Koch<sup>1</sup>, Jorge Berkhoff<sup>1</sup>, Norbert Blindow<sup>1</sup>, David Farías-Barahona<sup>2</sup>, Pedro Skvarca<sup>3</sup>, Johannes J. Fürst<sup>1</sup>, Matthias Braun<sup>1</sup>

<sup>1</sup>Department of Geography, Friedrich-Alexander-Universität Erlangen-Nürnberg, Erlangen, 91058, Germany

<sup>2</sup>Department of Geography, University of Concepción, Concepción, 4030000, Chile

<sup>3</sup>Glaciarium – Glacier Interpretive Center, El Calafate, 9201, Argentina

Correspondence to: Moritz Koch (Moritz.Koch@fau.de)

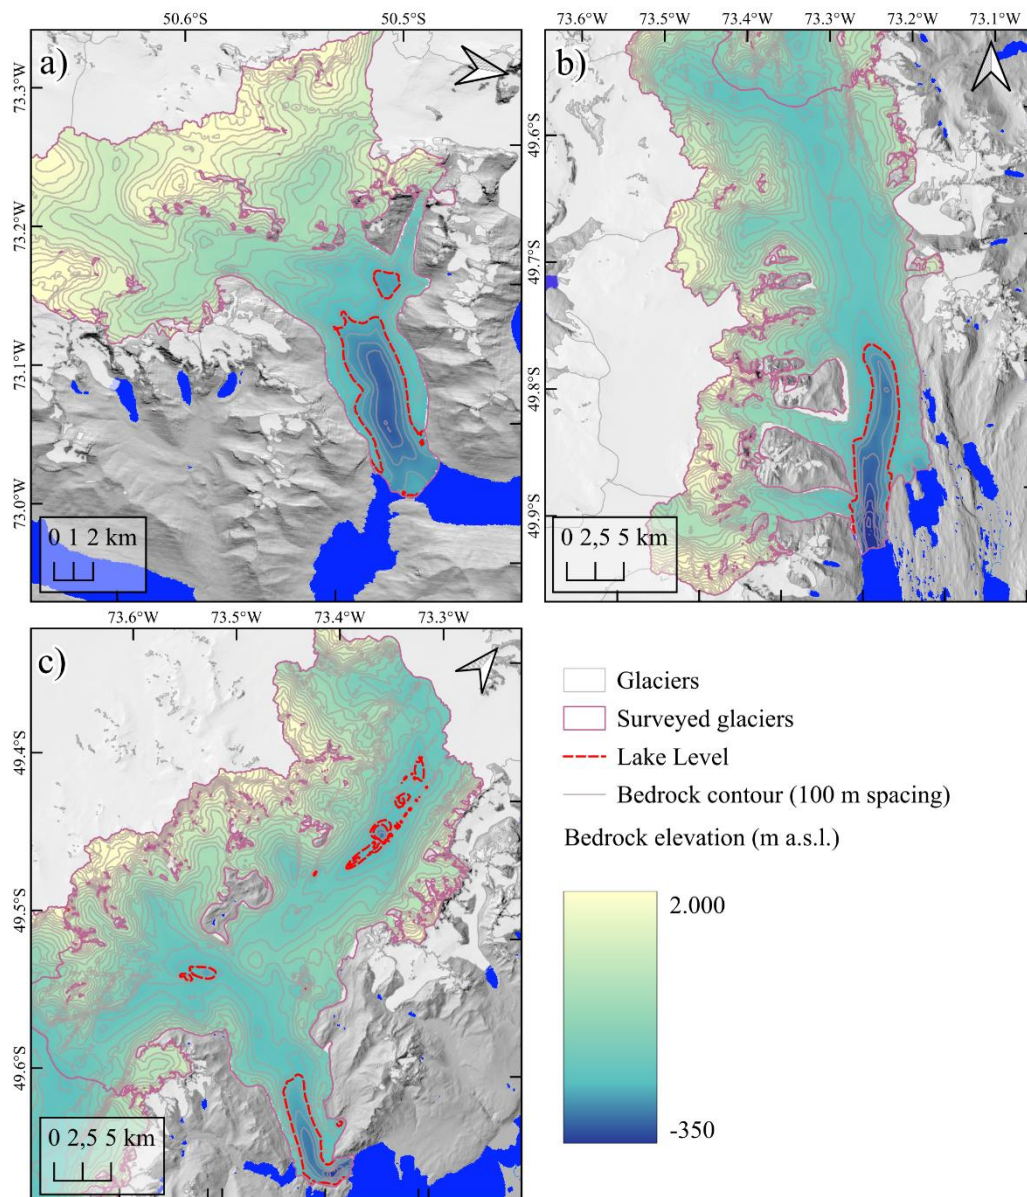

Supplementary Figure 1: Bedrock elevation of Glaciar Perito Moreno (a), Glaciar Upsala (b) and Glaciar Viedma (c). Contour lines (a-c) have a 100 m vertical spacing and highlight the deep glacial trough of Glaciar Upsala (b) as well as over deepened sections of Glaciar Viedma (c) and Glaciar Perito Moreno (a). The red dashed lines indicate areas at or below lake levels of Lago Viedma (c) and Lago Argentino (a & b). Glacier outlines (light red lines) are from RGI v7.0 and refer to the year 2000. The lake levels were derived from SRTM.

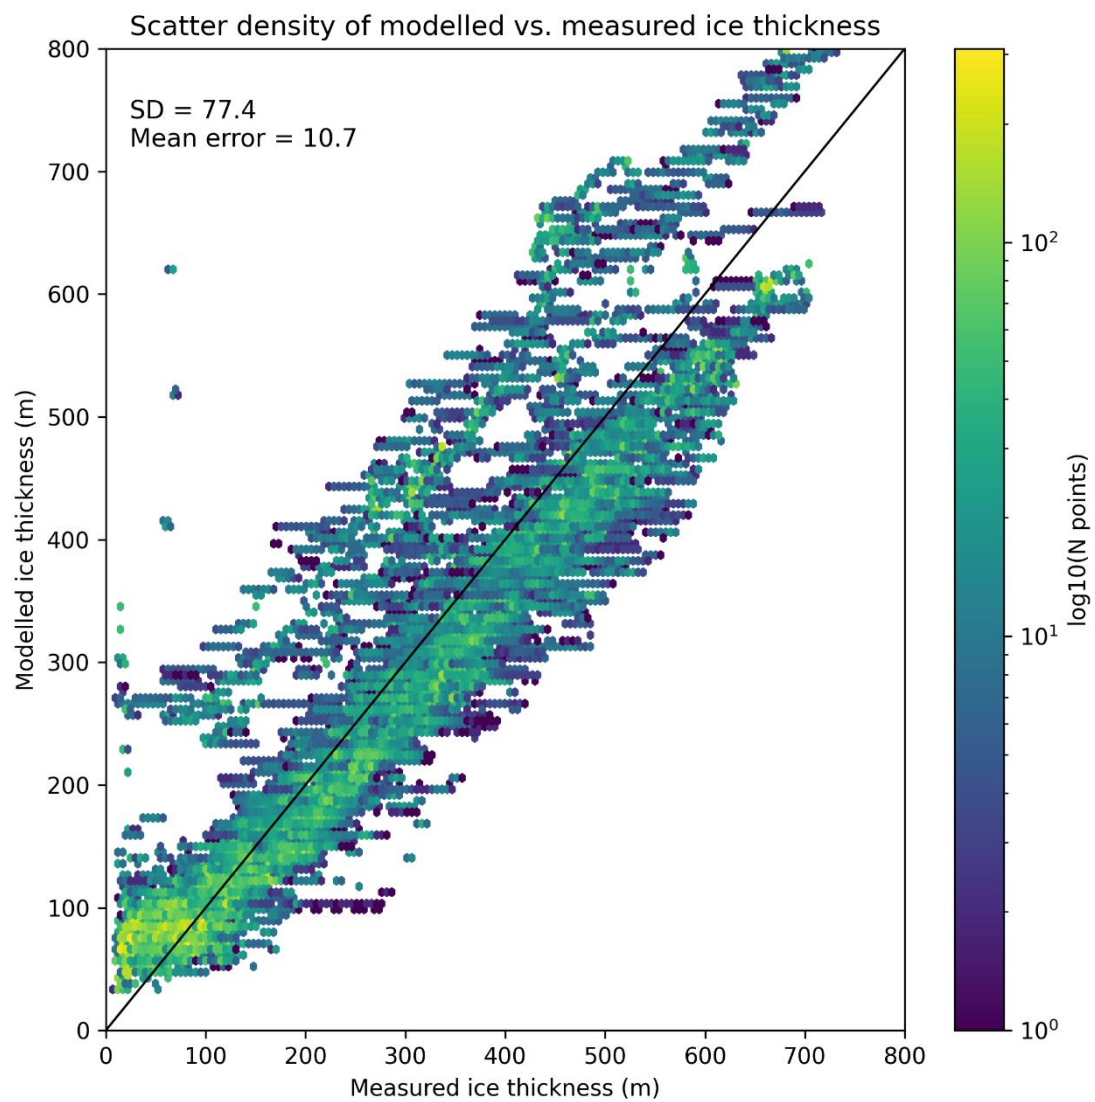

Supplementary Figure 2: Scatter plot modelled vs. observed ice thickness points ( $n = 116,021$ ).
